# Supplementary material for: Fouling Mitigation by Optimizing Flow Rate and Pulsed Electric Field during Bipolar Membrane Electroacidification of Caseinate Solution
Source: MDPI journal article supplement (doi:10.3390/membranes11070534), 2021-07-15
Supplement: s1 [file s1]

## Supplementary materials

**Table 1S.** Membrane properties (thickness and conductivity) before and after EDBM carried out in different conditions of flow rate (corresponding to indicated Reynolds numbers) and PEF current mode with pulse-pause durations of 10 s - 10 s, 10 s - 20 s, 10 s - 33 s and 10 s - 50 s. Reynolds numbers of 187, 374 and 560 correspond to flow rates of 7.8, 15.6 and 23.4 cm/s respectively.

| Current mode         |       |        | 10 s-10 s |         |         | 10 s-20 s |         |         | 10 s-33 s |         |         | 10 s-50 s |         |         |
|----------------------|-------|--------|-----------|---------|---------|-----------|---------|---------|-----------|---------|---------|-----------|---------|---------|
| Reynolds number      |       |        | 187       | 374     | 560     | 187       | 374     | 560     | 187       | 374     | 560     | 187       | 374     | 560     |
| Conductivity (mS/cm) | CEM   | Before | 8.87 ±    | 9.01 ±  | 8.39 ±  | 8.58 ±    | 8.99 ±  | 8.87 ±  | 9.02 ±    | 8.64 ±  | 8.64 ±  | 9.32 ±    | 8.66 ±  | 9.17 ±  |
|                      |       |        | 0.46 a    | 0.29 a  | 0.54 a  | 0.42 a    | 0.14 a  | 0.37 a  | 0.24 a    | 0.42 a  | 0.24 a  | 0.14 a    | 0.42 a  | 0.40 a  |
|                      |       | After  | 7.99 ±    | 8.05 ±  | 8.01 ±  | 8.20 ±    | 8.08 ±  | 7.90 ±  | 8.11 ±    | 7.73 ±  | 7.93 ±  | 8.63 ±    | 8.05 ±  | 8.15 ±  |
|                      |       |        | 0.49 bA   | 0.31 bA | 0.46 bA | 0.31 bA   | 0.09 bA | 0.10 bA | 0.38 bA   | 0.40 bA | 0.46 bA | 0.31 bB   | 0.24 bB | 0.21 bB |
|                      | BPM 1 | Before | 6.02 ±    | 5.51 ±  | 5.12 ±  | 4.86 ±    | 4.97 ±  | 4.97 ±  | 5.23 ±    | 5.47 ±  | 4.69 ±  | 5.54 ±    | 4.53 ±  | 5.11 ±  |
|                      |       |        | 0.89 a    | 0.72 a  | 0.38 a  | 1.23 a    | 0.76 a  | 0.60 a  | 1.14 a    | 0.21 a  | 0.63 a  | 1.01 a    | 0.14 a  | 0.98 a  |
|                      |       | After  | 6.49 ±    | 5.96 ±  | 6.13 ±  | 6.32 ±    | 5.83 ±  | 5.61 ±  | 5.95 ±    | 6.13 ±  | 5.61 ±  | 5.99 ±    | 5.91 ±  | 5.54 ±  |
|                      |       |        | 0.54 b    | 0.27 b  | 0.15 b  | 0.39 b    | 0.29 b  | 0.44 b  | 0.48 b    | 0.42 b  | 0.39 b  | 0.48 b    | 0.29 b  | 0.51 b  |
|                      | BPM 2 | Before | 5.46 ±    | 5.44 ±  | 4.33 ±  | 5.52 ±    | 4.03 ±  | 4.82 ±  | 4.93 ±    | 4.31 ±  | 5.00 ±  | 4.41 ±    | 5.98 ±  | 5.03 ±  |
|                      |       |        | 0.91 a    | 0.48 a  | 1.27 a  | 1.09 a    | 0.90 a  | 1.43 a  | 0.22 a    | 0.54 a  | 0.90 a  | 0.44 a    | 0.68 a  | 1.10 a  |
|                      |       | After  | 6.22 ±    | 6.23 ±  | 5.41 ±  | 6.61 ±    | 5.55 ±  | 6.21 ±  | 6.13 ±    | 5.82 ±  | 6.21 ±  | 5.86 ±    | 6.65 ±  | 5.87 ±  |
|                      |       |        | 0.71 b    | 0.30 b  | 1.17 b  | 0.59 b    | 0.91 b  | 0.65 b  | 0.01 b    | 0.50 b  | 0.47 b  | 0.44 b    | 0.56 b  | 0.68 b  |
| Thickness (mm)       | CEM   | Before | 0.151 ±   | 0.154 ± | 0.152 ± | 0.149 ±   | 0.148 ± | 0.155 ± | 0.154 ±   | 0.156 ± | 0.148 ± | 0.153 ±   | 0.153 ± | 0.154 ± |
|                      |       |        | 0.002 a   | 0.005 a | 0.009 a | 0.009 a   | 0.005 a | 0.009 a | 0.003 a   | 0.005 a | 0.006 a | 0.012 a   | 0.003 a | 0.008 a |
|                      |       | After  | 0.151 ±   | 0.151 ± | 0.156 ± | 0.154 ±   | 0.149 ± | 0.155 ± | 0.154 ±   | 0.158 ± | 0.151 ± | 0.157 ±   | 0.160 ± | 0.152 ± |
|                      |       |        | 0.010 a   | 0.002 a | 0.003 a | 0.005 a   | 0.006 a | 0.009 a | 0.001 a   | 0.004 a | 0.005 a | 0.012 a   | 0.003 a | 0.007 a |
|                      | BPM 1 | Before | 0.245 ±   | 0.245 ± | 0.240 ± | 0.243 ±   | 0.245 ± | 0.244 ± | 0.249 ±   | 0.246 ± | 0.243 ± | 0.241 ±   | 0.238 ± | 0.240 ± |
|                      |       |        | 0.005 a   | 0.002 a | 0.006 a | 0.004 a   | 0.004 a | 0.006 a | 0.006 a   | 0.002 a | 0.004 a | 0.004 a   | 0.002 a | 0.006 a |
|                      |       | After  | 0.245 ±   | 0.239 ± | 0.242 ± | 0.263 ±   | 0.244 ± | 0.247 ± | 0.250 ±   | 0.241 ± | 0.243 ± | 0.243 ±   | 0.243 ± | 0.242 ± |
|                      |       |        | 0.003 a   | 0.011 a | 0.004 a | 0.025 a   | 0.009 a | 0.003 a | 0.005 a   | 0.009 a | 0.005 a | 0.006 a   | 0.002 a | 0.010 a |
|                      | BPM 2 | Before | 0.243 ±   | 0.249 ± | 0.235 ± | 0.245 ±   | 0.239 ± | 0.244 ± | 0.240 ±   | 0.237 ± | 0.242 ± | 0.236 ±   | 0.241 ± | 0.243 ± |
|                      |       |        | 0.003 a   | 0.003 a | 0.007 a | 0.007 a   | 0.005 a | 0.002 a | 0.006 a   | 0.006 a | 0.010 a | 0.013 a   | 0.002 a | 0.002 a |
|                      |       | After  | 0.244 ±   | 0.245 ± | 0.239 ± | 0.251 ±   | 0.237 ± | 0.244 ± | 0.238 ±   | 0.239 ± | 0.243 ± | 0.237 ±   | 0.242 ± | 0.242 ± |
|                      |       |        | 0.012 a   | 0.002 a | 0.006 a | 0.007 a   | 0.006 a | 0.002 a | 0.004 a   | 0.005 a | 0.006 a | 0.004 a   | 0.001 a | 0.004 a |

\*Data marked with different letters (a, b or A, B) differ significantly from each other; lowercase letters indicate differences in conductivity and thickness before and after ED process for the same membrane; uppercase letters indicate differences between the electric current modes for the same membranes
